# Supplementary material for: Genetic Trends Estimation in IRRIs Rice Drought Breeding Program and Identification of High Yielding Drought-Tolerant Lines
Source: Research Square preprint supplement (doi:10.21203/rs.3.rs-910539/v1), 2021-09-22
Supplement: Supplementary file 1 [file 6340cd6c5d374e15a2ca7ad9.xlsx]

## Sheet: Info_sheet
Genetic Trends Estimation in IRRIs Rice Drought Breeding Program and Identification of High Yielding Drought Tolerant Lines
Apurva Khanna1, Mahender Anumalla1, Margaret Catolos1, Jerome Bartholome2, Roberto Fritsche-Neto1, John Damien Platten1 Daniel Joseph Pisano1, Alaine Gulles1, Ma Teresa Sta. Cruz1, Joie Ramos1, Gem Faustino1 Sankalp Bhosale1, Waseem Hussain1*
1Rice Breeding Platform, International Rice Research Institute (IRRI), Los Banos, Laguna, Philippines
2CIRAD, UMR AGAP, Montpellier, France, AGAP, Univ Montpellier, CIRAD, INRA, Montpellier SupAgro, Montpellier, France
* Corresponding author:
Waseem Hussain
International Rice Research Institute (IRRI), DAPO Box 7777, Metro Manila, Philippines
email: waseem.hussain@irri.org
Information: Table S1:	List of trials used in this study for genetic trend estimations and formulation of elite core panel
Information: Table S2:	Delineation of the traits and characteristics of top performing genotypes formulating the breeding panel

## Sheet: Table S1
Table S1: List of the trials with basic information used in this study for genetic trend estimations. The trial here is a combination of season, year and treatment
S.No	Trial Name	Year	Season	Treatment	Experimental Design	Blocks	Replications
Reproductive stage drought stress trials
1	2003-Stress-DS	2003	DS	Stress	Alpha lattice	8	4
2	2003-Stress-WS	2003	WS	Stress	Alpha lattice	5	3
3	2004-Stress-DS	2004	DS	Stress	Alpha lattice	7	2
4	2005-Stress-DS	2005	DS	Stress	Alpha lattice	11	4
5	2006-Stress-DS	2006	DS	Stress	Alpha lattice	11	3
6	2006-Stress-WS	2006	WS	Stress	Alpha lattice	10	3
7	2007-Stress-DS	2007	DS	Stress	Alpha lattice	8	3
8	2007-Stress-WS	2007	WS	Stress	Alpha lattice	13	3
9	2008-Stress-DS	2008	DS	Stress	Alpha lattice	13	3
10	2008-Stress-WS	2008	WS	Stress	Alpha lattice	11	3
11	2009-Stress-DS	2009	DS	Stress	Alpha lattice	16	3
12	2009-Stress-WS	2009	WS	Stress	Alpha lattice	12	3
13	2010-Stress-DS	2010	DS	Stress	Alpha lattice	17	3
14	2010-Stress-WS	2010	WS	Stress	Alpha lattice	10	3
15	2011-Stress-DS	2011	DS	Stress	Alpha lattice	10	3
16	2012-Stress-DS	2012	DS	Stress	Alpha lattice	28	3
17	2013-Stress-DS	2013	DS	Stress	Augmented RCBD	9	3
18	2014-Stress-DS	2014	DS	Stress	Alpha lattice	72	3
19	2015-Stress-DS	2015	DS	Stress	RCBD	14	3
20	2017-Stress-DS	2017	DS	Stress	Alpha lattice	24	2
21	2017-Stress-WS	2017	WS	Stress	Alpha lattice	23	2
22	2018-Stress-DS	2018	DS	Stress	Alpha lattice	22	2
23	2018-Stress-WS	2018	WS	Stress	Alpha lattice	15	2
24	2019-Stress-DS	2019	DS	Stress	Alpha lattice	21	2
Non-Stress Breeding Trials
26	2005-Non-Stress-DS	2005	DS	Non-Stress	Alpha lattice	11	3
27	2006-Non-Stress-DS	2006	DS	Non-Stress	Alpha lattice	11	3
28	2006-Non-Stress-WS	2006	WS	Non-Stress	Alpha lattice	10	3
29	2007-Non-Stress-DS	2007	DS	Non-Stress	Alpha lattice	8	3
30	2007-Non-Stress-WS	2007	WS	Non-Stress	Alpha lattice	13	3
31	2008-Non-Stress-DS	2008	DS	Non-Stress	Alpha lattice	13	3
32	2008-Non-Stress-WS	2008	WS	Non-Stress	Alpha lattice	11	3
33	2009-Non-Stress-DS	2009	DS	Non-Stress	Alpha lattice	16	3
34	2009-Non-Stress-WS	2009	WS	Non-Stress	Alpha lattice	12	3
35	2010-Non-Stress-DS	2010	DS	Non-Stress	Alpha lattice	17	3
36	2010-Non-Stress-WS	2010	WS	Non-Stress	Alpha lattice	10	3
37	2011-Non-Stress-DS	2011	DS	Non-Stress	Alpha lattice	10	3
38	2011-Non-Stress-WS	2011	WS	Non-Stress	Alpha lattice	18	3
39	2012-Non-Stress-DS	2012	DS	Non-Stress	Alpha lattice	28	3
40	2012-Non-Stress-WS	2012	WS	Non-Stress	Alpha lattice	18	3
41	2013-Non-Stress-DS	2013	DS	Non-Stress	Alpha lattice	6	3
42	2013-Non-Stress-WS	2013	WS	Non-Stress	Alpha lattice	19	3
43	2014-Non-Stress-DS	2014	DS	Non-Stress	Alpha lattice	72	3
44	2014-Non-Stress-WS	2014	WS	Non-Stress	Alpha lattice	14	3
45	2015-Non-Stress-DS	2015	DS	Non-Stress	Alpha lattice	14	2
46	2015-Non-Stress-WS	2015	WS	Non-Stress	RCBD	8	2
47	2016-Non-Stress-DS	2016	DS	Non-Stress	Alpha lattice	21	2
48	2017-Non-Stress-DS	2017	DS	Non-Stress	Alpha lattice	24	2
49	2017-Non-Stress-WS	2017	WS	Non-Stress	Alpha lattice	28	2
50	2018-Non-Stress-DS	2018	DS	Non-Stress	Alpha lattice	22	2
51	2018-Non-Stress-WS	2018	WS	Non-Stress	Alpha lattice	74	2
52	2019-Non-Stress-DS	2019	DS	Non-Stress	Alpha lattice	31	2
53	2019-Non-Stress-WS	2019	WS	Non-Stress	Augmented-RCBD	4	4

## Sheet: Table S2
Table S2: Detailed characteristics of 200 genotypes forming the breeding panel depicting the selection criterions followed to nail-down the top performers harboring high breeding values and reliabilities along with added merits for stress tolerance and quality traits
Designation	Breeding value Yield	Std error	PEV	Parentage	Probable QTLs	Biotic Stress Tolerance		Grain quality Characterstics						Additional Features (if any)	Cross type	Other Names	Reference source/link
						Blast	Blight	Average Grain Length	Average Grain Breadth	Amylose Content	%HRR	Chalkiness	ASV
IR 10N136	4622.59	280.738	0.582879	IR71606-1-1-4-2-3-1-2(NSIC110/IR73459-120-2-2-3		R	MR	6.78	2.39	28.6	50.6	15.4	I		Single cross	IR84727-91-2-3-3-1
IR 14D202	4480.63	274.595	0.600932	IR10F188/Kho470-3		R	MR								Single cross	IR95611-B-129-2-3-B-B
IR 14D198	4369.15	280.364	0.583988	IR10F188/Kho470-3											Single cross	IR95611-B-29-2-2-B-B
IR 14L545	4352.85	255.338	0.654944	IR09L272/IR10L165		R	MR	6.43	2.22	24.1	32.5	4.55	HI		Single cross	IR97046-39-2-1-2
IR 77081-B-61-2-3	4285.7	249.928	0.669409	IR70179-1-1-1-1/IR73887-1-8-2-1		MR	MR			27.1	50.6				Single cross	IR77081-B-61-2-3, IRTP23625
IR 77073-B-35-1-1	4219.67	237.202	0.70222	IR70169-3-2-1-2/IR73887-1-8-2-1		R	MR			22	41.5				Single cross	IR77073-B-35-1-1
IR 14D199	4209.61	268.208	0.619282	IR10F188/Kho470-3			S								Single cross	IR95611-B-29-2-3-B-B
IR 79168 H	4136.64	261.377	0.638428	IR68885A/7*IR68950-8-1-10-4-7-6-3//IR68950-8-1-10-4-7-6-3							20.2				Hybrid formation
IRRI 188	4132.09	242.189	0.689565	IR 72022-46-2-3-3-2/IR 57514-PMI 5-B-1-2		R	S	6.66	2.1	25.8	45.2	14	L		Single cross	Sahod Ulan 15, NSIC 2015 RC 420	https://sites.google.com/irri.org/irri60/home	https://sites.google.com/irri.org/irri60/home
IR13F597	4086.33	263.657	0.632093	IR07F290/IR67495-NDR2-1-1-1-1//IRRI154		MR	MR								Three-way cross	IR92704-SUB-SUB-6-2-B
IR 15D107	4084.16	261.768	0.637345	IRRI154/Mazhan//IR08N194		R	MR	6.56	2.45	28.2	43.2	12.5	I		Three-way cross	IR99202-B-34-1-2-B
IR 12N234	4072.33	263.492	0.632552	IR02N211/Teqing		R	MR	5.96	2.31	24.2	44.4	13.7	HI		Single cross	IR92239-78-3-1-2
IR 13F652	3981.89	264.168	0.630665	IR09F171/IR09F146//IR09F436		R	MR								Three-way cross	IR94161-SUB-SUB-2-B-B
IR 11N313	3979.59	263.485	0.632571	IR05N173/IRRI143//IR67966-44-2-3-2		R	MR								Three-way cross	IR89197-128-2-1-2
IR 03L316	3951.84	249.457	0.670656	IR70179-1-1-1-1/IR73885-1-4-3-2-1-6(MATATAG9)//IR70181-32-PMI1-UBN1-B-1-2		R				20.7	49.2	3.5	I		Three-way cross	IR77776-B-8-1-2
IR 14L395	3945.44	254.591	0.656959	IR09L317/IR10L149		R	MR	6.62	2.15	23.4	31.3	6.5	HI		Single cross	IR97067-32-1-1-3
IR 80635 H	3936.92	261.34	0.638529	IR68885A/7*IR68950-8-1-10-4-7-6-3//IR68950-8-1-10-4-7-6-3											Hybrid formation
IR 76538-147-3-B	3928.05	261.192	0.63894	D17-12/IC10-20		R	S				50.8				Single cross	IR76538-147-3-B
IR 14L613	3912.77	256.22	0.652555	IR10L149/IR10L165		R	S	6.7	2.07	26	30.2	3.6	L		Single cross	IR97077-4-1-1-3
IR 80641 H	3901	261.248	0.638784	D297A/7*IR68897B//IR68897B											Hybrid formation
IR 14L144	3884.47	254.3	0.657742	IR72022-46-2-3-3-2/IR09L224		R	MR	6.71	2.29	25.3	78.5	6.2	I/L		Single cross	IR93810-17-1-4-1
IR 79186 H	3869.02	273.906	0.602934	IR73328A/IR69502-6-SRN3-UBN2-B-2-2R							33.4				Hybrid formation
IR 77081-B-55-2-2	3840.12	249.487	0.670574	IR70179-1-1-1-1/IR73887-1-8-2-1		MR				22.9					Single cross	IR77081-B-55-2-2
IR 72176-140-1-2	3833.58	273.762	0.603352	IR57519-PMI5-B-2-2/IR57514-SRN299-2-1-1//IR43524-55-1-3-2		S	S			22.1	38.9				Single cross	IR72176-140-1-2
IRRI 181	3830.6	261.239	0.638809	IR02A127/Janaki		R	S	6.66	2.17	23.6	31.3	8.2	HI/I		Single cross	IR80894-18-2-2-3, Tubigan 31, NSIC 2014 RC 360
IR 77078-B-17-3-2	3819.76	250.212	0.668657	IR70177-76-3-1-1/IR72869-5-2-3-1		MR				26.7					Single cross	IR77078-B-17-3-2
IR 14L297	3771.64	253.84	0.658981	IR09L337/IR09L154		R	S	6.44	2.15	23.9	35.8	8	HI		Single cross	IR97034-21-2-1-3
IR 14L157	3762.38	274.912	0.600012	IR81039-B-173-U3-3/IR81063-B-94-U3-1		R	MR	6.63	2.2	25.9	42.4	5.3	L	Stable and high-yielding in alternate wetting and drying across variable ecosystems	Single cross	IR93827-29-1-1-4	Sandhu et al. 2017
IR 12L152	3758.02	413.453	0.095282	IRRI174/IR77298-14-1-2-10										High yield potential under multi-environment testing	Single cross	IR89904-26-5-2-2	Vergara et al. 2016
IR 77780-B-5-3-2	3750.11	235.974	0.705293	IR70179-1-1-1-1/IR73887-1-8-2-1//IR70210-16-CPA2-B-1-1-1		MR				22.4					Three-way cross	IR77780-B-5-3-2
IR 14L601	3736.72	256.376	0.652132	IR09L272/IR09L337		R	MR								Single cross	IR97045-24-1-1-1
IRRI 119	3698.75	232.134	0.714808	IR43581-57-3-3-6/IR26940-20-3-3-3-1//Khao Dawk Mali 105		S	S	7.01	2.34	28.8	41.1	14.5	I	63.5MR, 5.5 PC	Three-way cross	IR57515-PMI-8-1-1-SRN-1-1, PSB RC 68
IR 77080-B-6-2-2	3657.11	228.339	0.724056	IR70179-1-1-1-1/IR73885-1-4-3-2-1-6		MR	MR			23.9	33.2				Single cross	IR77080-B-6-2-2
IR 15D112	3656.76	258.698	0.645802	Kalarata1-24/Kho//IR08N194		R	MR								Three-way cross	IR99205-B-8-3-B-B
IR 06L771	3650.36	325.657	0.438719	IR01A102/CT6510-24-1-2						22.9					Single cross	IR81047-B-106-4-3
IR 03L315	3642.44	250.321	0.668369	IR70183-74-1-1-3-B/IR73887-1-8-2-1		MR									Single cross	IR77084-B-20-3
IR 71700-247-1-1	3633.45	273.712	0.603496	IR57519-PMI5-B-2-2/IR57514-SRN299-2-1-1//IR43524-55-1-3-2		MR	MR			23.1	37.5				Single cross	IR71700-247-1-1
IR 82608-B-B-11-1	3630.52	330.3	0.422599	IR49830-7-1-2-3/IR77078-B-17-3-2				6.8	2.21	28	48.5	4	L		Single cross	IR82608-B-B-11-1
IR 14L362	3626.14	254.634	0.656843	IR09L272/IR09L337		R	MR	6.6	2.31	23.9	60.3	1.6	L		Single cross	IR97045-26-1-1-3
IR 77081-B-61-2-1	3617.39	235.811	0.705702	IR70179-1-1-1-1/IR73887-1-8-2-1		S				26.4					Single cross	IR77081-B-61-2-1
IR 82608-B-B-39-1	3615.05	330.252	0.422766	IR49830-7-1-2-3/IR77078-B-17-3-2				6.79	2.13	25	51.7	3	L		Single cross	IR82608-B-B-39-1
IR 70181-26-PMI 2-9-1-2	3614.36	273.749	0.603388	IR43524-55-1-3-2/IR57519-PMI5-B-2-2//IR43487-11-2-3-2											Three-way cross	IR70181-26-PMI-2-9-1-2
IR 80642 H	3613.34	261.255	0.638766	G46A/7*IR68897B//IR68897B											Hybrid formation	0
IR 02L111	3611.19	235.821	0.705677	IR70183-74-1-1-3-B/IR73887-1-8-2-1		MR									Single cross	IR77084-B-5-1-1
IR 98976-20-1-2-1	3608.06	258.346	0.646764	IR11L152/Sabitri		R	MR	6.59	2.21	22.2	19.8	5.1	I		Single cross	IR98976-20-1-2-1
IR 11A306	3601.01	257.784	0.648299	IR04A427/IR73006-12-3-3-2		R	MR	7.11	2.14	23.3	46.5	9.5	I	Possess high recovery percent after rehydration via increased chlorophyll content	Single cross	IR87531-25-3-3-3	Bashier et al. 2018
IRRI 163	3599.56	222.801	0.73728	WS91/Abhaya//IR43070-UBN511-2-1-1-1		R	MR			22.41	38.3	8	L	65.4% MR, 7.5% PC	Three-way cross	Sahod Ulan 6, NSIC 2011 RC 280	https://sites.google.com/irri.org/irri60/home
IR 06L141	3591.39	324.997	0.440991	IR70181-26-PMI2-9-1-1/PSB RC 18			MR								Single cross	IR80411-B-160-4
IR 75417-R-R-R-R-267-4	3581.81	327.666	0.431771	SBIR67471-M-8-1-1-1-1/Sabita			MR			28.6					Single cross	IR75417-R-R-R-R-267-4
IR 14D151	3580.71	256.697	0.651259	IR10F188/Kho487-4		R	MR	6.68	2.23	24.1	41.5	4.1	I		Single cross	IR95610-B-84-3-B-B
IR 77080-B-34-1-1	3577.71	228.224	0.724335	IR70179-1-1-1-1/IR73885-1-4-3-2-1-6		MR	R			22.9	43.8				Single cross	IR77080-B-34-1-1
IR 15D109	3571.11	257.06	0.650272	Kalarata1-24/Kho//IR08N194		R	MR								Three-way cross	IR99205-B-8-3-3-B
IR 70181-32-PMI-1-1-5-1-PCR-105	3568.23	251.65	0.664839	IR69237//IR43487/IR43487-11-2-3											Three-way cross	IR70181-32-PMI-1-1-5-1
IR 14L133	3558.42	257.502	0.649068	IR72022-46-2-3-3-2/IR77298-5-6-18		MR	MR	6.4	2.28	24.2	32.5	16.3	I		Single cross	IR93809-9-1-1-3
IR 07L295	3556.58	342.105	0.380588	IR73711-130-1-3-1/IR77782-B-10-1-2//IR70210-39-CPA7-1-1-4-2											Three-way cross	IR81187-B-B-110-1
IR 14D201	3551.47	259.592	0.643349	IR10F188/Kho470-3			S								Single cross	IR95611-B-178-3-3-B-B
IR 82082-B-B-70-3	3548.36	342.909	0.377672	IR77080-B-6-2-2/IR74371-78-1-1						28	33.12	15			Single cross	IR82082-B-B-70-3
IR 77843 H	3541	238.514	0.698916	IR70369A/IR57298-174-2-2R		MR				23.1	42.3				Hybrid formation
IR 79477-65-3-1-1	3533.69	338.731	0.392747	IR73005-135-3-3-2/IR71730-51-2											NA	IR79477-65-3-1-1
IR 06L767	3531.37	329.268	0.4262	IR01A102/CT6510-24-1-2											Single cross	IR81047-B-106-3-3
IR 11L108	3515.17	378.911	0.24014	IR77080-B-4-2-2/IR71525-19-1-1				6.6	2	18.5	54.6	1	I/L		Single cross	IR87690-18-1-1-1
IR 70213-10-CPA 4-2-2-2	3499.18	251.095	0.666314	IR57519-PMI5-B-2-2/IR52555-UBN3-2-1//IR43524-55-1-3-2											Three-way cross
IR 88960-22-1-1-1	3497.5	409.582	0.112145	IRRI123/IR05N131	Xa5	R		6.6	2	19.6	31.6	11	HI/I	Possesses Waxy - 1	Single cross	IR88960-22-1-1-1	Acharya et al. 2018
IR 81396-B-B-10-1	3496.19	297.555	0.531406	IR55423-01/IR73571-3B-14-1						24	36.48	10			Single cross	IR81396-B-B-10-1
IR11A282	3493.79	402.343	0.143251	IR04A427/BR29		R	MR	7.12	2.37	25.3	37.1	18.6	I		Single cross	IR87527-119-1-2-4
IR 78555-3-2-2-2	3493.36	271.082	0.611078	IR72870-102-2-2-1-3/IR72870-19-2-2-3											Single cross	IR78555-3-2-2-2
IR 82607-B-B-94-2	3492.88	330.254	0.422761	IR49830-7-1-2-3/IR77073-B-35-1-1				6.81	2.31	27	23.8	23	L		Single cross	IR82607-B-B-94-2
IR 80411-B-28-4	3492.31	324.991	0.441011	IR70181-26-PMI2-9-1-1/PSB RC 18			MR								Single cross	IR80411-B-28-4
IR12L144	3484.71	413.455	0.095272	IR77298-5-6-18/2*MTU1010	qDTY12.1,qDTY13.2										Backcross	IR12L144
IR06L522	3483.96	366.859	0.287707	IR55423-01/IR73571-3B-14-1											Single cross	IR81396-B-B-22-1
IRRI 161	3482.95	282.333	0.578126	IR57514-PMI5-B-1-2/IRRI123						18.7	35.8	5.2	I	Resistant to moderately resistant to Whiteheads (WSB & YSB); moderately resistant to green leafhopper across season	Single cross	IR81412-B-B-82-1, Sahod Ulan 3, NSIC 2011 RC 274
IR 70845-53-1-B-3	3480.85	237.307	0.701955	Abhaya/IRRI119//CN846-6-6		S	MR			25.8	40.3				Three-way cross	IR70845-53-1-B-3
IR 79187 H	3472.61	273.723	0.603462	IR68885A/7*IR68950-8-1-10-4-7-6-3//IR68950-8-1-10-4-7-6-3							29.2				Hybrid formation
IR04A305	3472.16	269.391	0.615915	IR62243-41-1-3-3/IR64680-81-2-2-1-3//IR73885-1-4-3-2-1-6											Three-way cross	IR78168-51-1-3-1-6
IR 82667-B-B-17-4	3471.7	352.134	0.343739	IRRI122/IR77078-B-17-3-2											Single cross	IR82667-B-B-17-4
IR 80413-B-10-3	3465.42	324.317	0.443329	IR70181-70-PMI3-5-B-2/IR77082-B-87-2-2			MR								Single cross	IR80413-B-10-3
IR 06L764	3458.82	291.503	0.550275	IR01A102/CT6510-24-1-2						25.3					Single cross	IR81047-B-106-2-3
IR 87694-18-1-2-3	3457.32	378.142	0.243218	IR77080-B-4-2-2/IR78933-B-24-B-B-1				6.7	2	29.6	66.2	7	L		Single cross	IR11L198
IR 14L586	3456.64	253.905	0.658804	IR05N173/IR10L149				7.22	2.26	26.7	32.5	1.8	I		Single cross	IR97093-6-2-2-2
IR 09L224	3455.77	326.28	0.436569	IR71700-247-1-1-2/IR72875-94-3-3-2				6.5	2	24.8	30.5	8	I		Single cross	IR83373-B-B-24-4
IR 06L134	3454.92	327.684	0.431709	IR72981-92-1-1-2-2/IR77080-B-34-1-1			S								Single cross	IR80431-B-57-1
IR 81187-B-B-195-1	3454.53	301.327	0.519454	IR73711-130-1-3-1/IR77782-B-10-1-2//IR70210-39-CPA7-1-1-4-2						27	57.68	7			Three-way cross	IR81187-B-B-195-1
IR 06L765	3444.34	326.088	0.437231	IR01A102/CT6510-24-1-2											Single cross	IR81047-B-106-3-1
IR 70210-39-CPA 7-1-1-4-2	3436.24	231.902	0.715377	IR54119-SRN4-B-1-1/Khao Dawk Mali 105//IR46329-SRN-31-3-2-1											Three-way cross	IR70210-39-CPA-7-1-1-4-2
IR 10L182	3435.04	377.604	0.245369	IR70181-32-PMI1-1-5-1/IRRI163				6.55	1.99	28.1	30.4	2	L		Single cross	IR84852-B-12-1-4
IR 09L305	3432.32	326.585	0.435513	IR72022-46-2-3-3-2/IR57514-PMI5-B-1-2				6.69	2.08	26	57.2	2	L		Single cross	IR83383-B-B-140-2
IR 81187-B-B-136-2	3431.1	297.543	0.531445	IR73711-130-1-3-1/IR77782-B-10-1-2//IR70210-39-CPA7-1-1-4-2						24	51.6	12			Three-way cross	IR81187-B-B-136-2
IR 81412-B-B-72-3	3430.71	297.55	0.531425	IR57514-PMI5-B-1-2/IRRI123						24	50.32	9			Single cross	IR81412-B-B-72-3
IR 82608-B-B-84-1	3430.07	352.134	0.343739	IR49830-7-1-2-3/IR77078-B-17-3-2											Single cross	IR82608-B-B-84-1
IR 82082-B-B-96-1	3427.4	342.9	0.377708	IR77080-B-6-2-2/IR74371-78-1-1						28	25.52	1			Single cross	IR82082-B-B-96-1
IRRI 213	3426.18	225.451	0.730992	IR70179-1-1-1-1/IR73885-1-4-3-2-1-6		S	R	6.78	2.07	23.9	52	1.9	I		Single cross	IR77080-B-34-3
IR 11L416	3426.07	410.418	0.108516	IRRI123/IR06N102				6.7	2.1	21.9	45.5	14	I	Stable yield producer and drought tolerant	Single cross	IR88965-39-1-1-3
IR 03L312	3420.68	237.264	0.702063	IR70177-76-3-1-1/IR72869-5-2-3-1		MR	S								Single cross	IR77078-B-8-2-1
IR 06L766	3419.26	294.71	0.540324	IR01A102/CT6510-24-1-2						24					Single cross	IR81047-B-106-3-2
IR 83383-B-B-140-4	3418.64	318.22	0.46406	IR72022-46-2-3-3-2/IR57514-PMI5-B-1-2				647	2.08	26.2	42	2	L		Single cross	IR83383-B-B-140-4
IR 09L343	3416.68	325.244	0.440141	IR72022-46-2-3-3-2/IR57514-PMI5-B-1-2				6.8	2	25.1	42.7	3	L		Single cross	IR83383-B-B-141-1
IR 87761-66-2-2-3	3415.64	378.148	0.243195	IR06L164/IR81454-B-B-172	Xa4+ Xa5		MR	6.8	2	25.5	60.1	8	I		Single cross	IR11L199	Acharya et al. 2018
IR 10L186	3414.08	339.303	0.390693	IRRI163/IRRI123				6.68	2.06	27.1	46.7	1	L		Single cross	IR84885-B-5-2-1
IR 04A428	3411.02	281.414	0.580867	IR73718-1-2-1-3/PSB RC 10				6.54	2.49	27.4	17	19.4	I		Single cross	IR78585-64-2-4-3
IR 09L316	3410.91	346.232	0.365553	IR72022-46-2-3-3-2/BCF1736				6.5	2	21.5	36.2	1	L		Single cross	IR83383-B-B-140-3
IR 03L313	3409.58	237.402	0.701716	IR70179-1-1-1-1/IR73885-1-4-3-2-1-6		MR	MR								Single cross	IR77080-B-19-2-1
IR 06L769	3408.49	293.113	0.545294	IR01A102/CT6510-24-1-2						23.4					Single cross	IR81047-B-106-4-1
IR 06L759	3408.44	325.652	0.438735	IRRI143/UPLRi7											Single cross	IR81027-B-88-3-4
IR 80431-B-44-4	3408.2	269.371	0.615973	IR72981-92-1-1-2-2/IR77080-B-34-1-1			MR								Single cross	IR80431-B-44-4
IR 07L304	3405.91	338.666	0.392978	IR73711-130-1-3-1/IR77782-B-10-1-2//IR70210-39-CPA7-1-1-4-2											Three-way cross	IR81187-B-B-33-1
IR 11L248	3402.91	378.936	0.240038	IR06L164/IR79906-B-192-2-3				6.8	2.1	30.4	45.1	5	I		Single cross	IR87754-42-1-1-1
IR 02L109	3401.86	237.752	0.700837	IR70179-1-1-1-1/IR73887-1-8-2-1		S	MR								Single cross	IR77081-B-42-3-1
IR 70215-2-CPA-2-1-B-2	3401.11	273.733	0.603435	IR57519-PMI5-B-2-2/IR57514-SRN299-2-1-1//IR43524-55-1-3-2		S	R								Three-way cross	IR70215-2-CPA-2-1-B-2
IRRI 180	3400.54	283.258	0.575356	IR73718-1-2-1-3/PSB RC 10				6.79	2.25	24.1	46.4	2.9	I		Single cross	IR78585-98-2-2-1, Tubigan 29, NSIC 2014 RC 356
IR 02L108	3394.55	239.195	0.697194	IR70179-1-1-1-1/IR73885-1-4-3-2-1-6		MR									Single cross	IR77080-B-58-1-3
IR 14L440	3392.81	253.81	0.65906	IR05N173/IR09L272				6.63	2.17	24.8	27.5	13.3	HI		Single cross	IR97083-36-1-2-3
IR 02L110	3383.34	229.889	0.720298	IR70183-74-1-1-3-B/IR73887-1-8-2-1		MR	R								Single cross	IR77084-B-4-3-3
IR 03L212	3382.73	250.154	0.66881	IR70177-76-1-1-3/IR72884-126-1-2-3		MR									Single cross	IR77076-B-26-1-2
IR 70179-1-1-1-1-B	3377.26	235.825	0.705665	IR43524-55-1-3-2/IR57514-SRN299-2-1-1//IR54119-SRN4-B-1-1		S	R				52.8				Three-way cross	IR70179-1-1-1-1-B
IR 98785-10-1-1-3	3376.83	256.702	0.651246	IRRI176/IR11L184				7.21	2.27	22.1		3.93	I		Single cross	IR98785-10-1-1-3	Acharya and Sujatha, 2021
IR 77778-B-8-1-2	3375.59	226.655	0.728112	IR70179-1-1-1-1/IR73885-1-4-3-2-1-6//IR70215-4-CPA1-UBN1-1-3		MR	MR	6.58	1.98	22.9	45.9	15	I		Three-way cross	IR77778-B-8-1-2
IR 80228 H	3375.28	233.467	0.711523	IR70369A/IR73885-1-4-3-2-1-6R		MR									Single cross
IRRI 200	3374.93	349.961	0.351814	IR71700-247-1-1/IRRI123		MR		6.5	2.12	20.1 LS	49.8	9.6	I		Single cross	Sahod Ulan 25, NSIC 2016 RC 478	https://sites.google.com/irri.org/irri60/home	https://www.pinoyrice.com/rice-varieties/
IRRI 218	3374.91	265.701	0.626365	IR70181-26-PMI2-9-1-1/PSB RC 18			R	7.06	2.36	24.3	50.6	5.4	I		Single cross	IR80411-B-49-1	https://sites.google.com/irri.org/irri60/home
IR 02L105	3369.99	229.997	0.720035	IR70177-76-1-1-3/IR72884-126-1-2-3		S									Single cross	IR77076-B-21-1-2
IR 17L1342	3368.15	411.093	0.105582	IR111242/IR105145										High yield potential under DSR	Single cross	IR115844-B-B-281-1-2
IR 02L106	3361.93	236.032	0.705148	IR70179-1-1-1-1/IR73885-1-4-3-2-1-6		R	MR								Single cross	IR77080-B-13-2-2
IR14D134	3360.37	256.676	0.651317	IR10F188/Kho487-4		MR									Single cross	IR95610-B-67-2-B-B	Sharma et al. 2020
IR 03L314	3341.76	249.836	0.669653	IR70179-1-1-1-1/IR73887-1-8-2-1		R									Single cross	IR77081-B-37-1-1
IR 80463-B-39-3	3339.36	324.317	0.443329	IR77080-B-34-3/IR73707-45-3-2-3			MR								Single cross	IR80463-B-39-3, CAR14
IR 72022-17-2-1-2	3337.7	235.785	0.705765	IRRI119/CN846-6-6//IR63429-23-1-3-3		R				22.7					Three-way cross	IR72022-17-2-1-2
IR 74137-5-3-3-1	3320.32	237.852	0.700585	IR70175-42-1-1-1-3/PSB RC 18		R	MR			22.1	48.6				Single cross	IR74137-5-3-3-1
IR 70215-70-CPA 3-4-1-3	3313.48	258.88	0.645303	IR57519-PMI5-B-2-2/IR57514-SRN299-2-1-1//IR43524-55-1-3-2											Three-way cross	IR70215-70-CPA3-4-1-3	Torres and Henry, 2018
IR 02L112	3302.95	239.514	0.696385	IRRI119/CN846-6-6//IR63429-23-1-3-3		S	MR								Three-way cross	IR72022-7-6-3-2-3
IR 17L1451	3292.16	411.083	0.105624	IR111243/IR105146				7.06	2.16	50.2	23.3	5.6	I/L	High yield potential under DSR	Single cross	IR115845-B-222-1-1-2
IR 77076-B-27-1-1	3291.36	236.019	0.705181	IR70177-76-1-1-3/IR72884-126-1-2-3		MR				23.4					Single cross	IR77076-B-27-1-1
IR 14L420	3277.83	256.41	0.652039	IR10L149/IR10L137				6.58	2.1	26.1	28.5	4.1	L		Single cross	IR97076-27-1-2-3
IR 02L107	3276.48	225.887	0.729951	IR70179-1-1-1-1/IR73885-1-4-3-2-1-6		S	MR								Single cross	IR77080-B-4-2-2
IR 70825-16-2-B-5-B-2	3273	235.971	0.705302	IR69957/SK8-21-3-1		MR				22.3					Three-way cross	IR70825-16-2-B-5-B-2
IR 70204-32-1-B-2	3269.98	249.558	0.670386	IR49746-UBN-33-B-3-1/IR51052-5-2-1-1-2//IR43524-55-1-3-2		MR									Three-way cross	IR70204-32-1-B-2
IR 16L1191	3257.12	397.801	0.162487	Dular/IRRI148///IRRI154/UPLRi7//IR87707-446-B-B-B/Kaliaus				6.98	2.46	25.2	45.2	15.8	I	High yield potential under DSR	Complex cross	IR107891-B-B-1253-1-1
IRRI 164	3252.08	235.445	0.706614	IR1529-ECIA/IR65564-22-2-3//IR68		R				22.2 (LS)	41.2	7.2		Resistant to moderately resistant to Whiteheads (WSB&YSB) moderately resistant to green leafhopper	Three-way cross	IR74963-262-5-1-3-3, Sahod Ulan 8, NSIC 2011 RC 284
IR 72022-46-2-3-3-2	3237.69	231.978	0.715191	IRRI119/CN846-6-6//IR63429-23-1-3-3		MR	MR			25.2	25.7				Three-way cross	IR72022-46-2-3-3-2
IR 15D114	3225.73	256.753	0.651109	Kalarata1-24/Kho//IR08N194											Three-way cross	IR99205-B-53-1-B-B
IRRI 144	3219.2	236.374	0.704294	IR68897A/IR71604-4-1-4-4-4-2-2-2R		R				22.8	48.1	44.6		66% MR	Hybrid formation	IR78386H, Mestizo 7, IR78386H, NSIC RC 136H
IR 17L1324	3217.63	411.006	0.10596	IR111242/IR105145				6.39	2.26	25.2	51.1	1.6	L	High yield potential under DSR	Single cross	IR115844-B-342-1-1-1
IR 14L155	3201.57	255.702	0.653959	IR81039-B-173-U3-3/IR81063-B-94-U3-1				6.39	2.19	25.8	78.9	4.9	I/L		Single cross	IR93827-29-1-1-2
IR 14L156	3193.86	253.432	0.660074	IR81039-B-173-U3-3/IR81063-B-94-U3-1		MR		6.4	2.14	24.4	39.3	6	L		Single cross	IR93827-29-1-1-3
IR 10F559	3193.55	402.371	0.143131	IR80410-B-197-4/IRRI149//NSIC RC158	Sub1A			6.41	2.38	26.1	51	2.5	I	Highly tolerant to Drought and submergence	Three-way cross	IR88228-33-3-5-2	https://www.pinoyrice.com/rice-varieties/
IRRI 175	3187.57	309.418	0.493299	IR01A102/CT6510-24-1-2						22.1	44.7	43.6	L	Resistant to Rice Tungro Virus	Three-way cross	IR81047-B-106-2-4, Sahod Ulan 12, NSIC 2013 RC 348
PSB RC 14	3183.17	231.385	0.716645	IR64/C1064-13				6.62	2.03	24.33	51.87	5.1	HI/I	65.78% MR, 7.3 % PC	Single cross	C2764-10-2, PSB RC 14, RIOGRANDE	https://ovcre.uplb.edu.ph/research/our-technologies/article/230-psb-rc-14-rice
IR 14L146	3182.67	256.908	0.650685	IR72022-46-2-3-3-2/IR09L224				6.82	2.13	77.8	24.1	6.2	I		Single cross	IR93810-2-1-1-2	Sandhu et al. 2017
IR 17L1177	3181.09	411.519	0.103728	HHZ8-SAL6-SAL3-Y2*3/Bungamehu				6.3	2.49	25.8	46.6	11.1	I	High Tolerant to Drought and high grain Zinc	Backcross	IR117827-B-3-4-1-4
IR 14D145	3178.11	256.697	0.65126	IR10F188/Kho487-4											Single cross	IR95610-B-15-1-B-B
IR 15F1706	3167.16	413.122	0.0967328	IR10F365/IR09L342				6.84	2.4	23.7	32.7	20.3	I	Low CT and High CF	Single cross	IR103387-B-B-3-3
IR 77266 H	3155.07	252.836	0.661672	IR62829A/6*IR62856-15-3-1-1-7-5-10-3//IR62856-15-3-1-1-7-5-10-3		R				22.1					Hybrid formation
IR 17L1574	3134.69	431.516	0.0145044	IR111243/IR105146				6.99	2.21	25.8	44.8	1.7	I	High yield potential under DSR	Single cross	IR115845-B-438-1-1-1
IR 87707-446-B-B-B	3122.74	413.132	0.0966854	IR77298-14-1-2-10/IR77298-5-6-11	qDTY2.1+ qDTY4.1	MR	MR	6.68	2.22	22.1	42.7	9.1	I	The variety has been releases in Nepal by the name Sukha Dhan 4	Single cross	Sukkha Dhan 4	https://strasa.irri.org/varietal-releases
IR 98824-5-2-1-2	3116.43	256.766	0.651072	IR11L108/Sambha Mahsuri				6.93	2.11	24.2	49.9	6.4	I		Single cross	IR98824-5-2-1-2
IR 70215-4-CPA-1-2-B-2-1	3107.3	235.907	0.705462	IR57519-PMI5-B-2-2/IR57514-SRN299-2-1-1//IR43524-55-1-3-2		R	MR								Three-way cross	IR70215-4-CPA-1-2-B-2-1
IRRI 132	3103	223.621	0.735342	UPLRi5/IR12979-24-1	qDTY1.1+qDTY2.1+qDTY3.1+qDTY6.1			5.99	2.47	22.7	49.5	5.4	I	First generation of tropical aerobic rice varieties	Single cross	IR55423-01, APO, NSIC RC9, Pyari	https://sites.google.com/irri.org/irri60/home
IR 14L360	3089.94	256.197	0.652617	IR09L272/IR09L337				6.28	2.26	24.1	45.3	0.8	I/L		Single cross	IR97045-21-1-1-1	Sandhu et al. 2017
IR 95780-43-1-1-1	3083.62	252.513	0.662536	IR09L242/IR09L343		MR		7.04	2.25	22.2	45	5.8	I		Single cross	IR95780-43-1-1-1
IR 15D108	3077.65	256.774	0.651051	IRRI154/Mazhan//IR08N194											Three-way cross	IR99202-B-38-3-2-B
IR11L101	3073.52	236.861	0.703073	IR55419-4*2/Wayrarem	qDTY3.1+qDTY6.1 +qDTY6.2+qDTY12.1	R									Backcross	IR74371-46-1-1
IR14L135	3061.94	255.802	0.653687	IR72022-46-2-3-3-2/IR77298-5-6-18				6.62	2.21	23.7	27.6	6.3	I		Single cross	IR93809-9-2-1-4	Sandhu et al 2017
IR14L604	3044.03	256.134	0.652788	IR09L272/IR09L337				6.39	2.27	26.5	33	0.9	L		Single cross	IR97045-26-1-1-2
IR 09L204	3040.93	370.634	0.27297	IR72022-46-2-3-3-2/Swarna	BPH25			6.86	2.27	25.2	34.6	12.8	L	Posess BPH25	Single cross	Sukha Dhan 5, IR 83388-B-B-108-3	Bhagwat et al. 2017; https://www.rkbodisha.in/sites/default/files/2019-10/STRVs%20Varietal%20Catalogue-Stress%20Tolerant%20Rice-Paddy%20Varieties%20-%20English.pdf
IR 77077-B-28-1-2	3035.95	230.081	0.71983	IR70177-76-1-1-3/IR73887-1-8-2-1		MR	MR			18.6	48.6				Single cross	IR77077-B-28-1-2
IR 01L102	3023.38	236.336	0.704389	IR69502-15-SRN4-UBN3-B-7/2*Khao Dawk Mali 105		R									Backcross	IR74627-45-47-1-2-1
IR 02L104	3011.14	229.922	0.720216	IR70177-76-1-1-3/IR72884-126-1-2-3		S	MR								Single cross	IR77076-B-15-1-1
IR 95840-35-1-2-3	3009.54	255.718	0.653915	IR08N158/IR10L105				6.96	2.28	26.7	79.6	2	L		Single cross	IR95840-35-1-2-3
IR 98853-6-1-3-2	3002.79	257.287	0.649654	IR11L269/IR05N229				6.89	2.09	25.1	29.6	5.2	I		Single cross	IR98853-6-1-3-2
IRRI 199	2944.78	413.16	0.0965662	Moroberekan/3*Swarna	qDTY3.2			5.73	2.33	1.3	57.8	69.6	L		Backcross	NSIC 2016 RC 474, Sahod Ulan 23, IR91648-B-20-B-3-1
IR 17L1432	2976.2	432.145	0.0116292	IR111242/IR105145				6.52	2.24	22.9	40.2	9.5	I	High yield potential under DSR	Single cross	IR115844-B-B-561-1-1
IR 14L345	2968.97	253.858	0.65893	IR09L272/IR10L128				6.67	2.24	24.8	37.5	0.3	L		Single cross	IR97043-33-4-1-3
IR 70179-10-1-1-2-3-2-2	2960.35	230.002	0.720021	IR43524-55-1-3-2/IR57514-SRN299-2-1-1//IR54119-SRN4-B-1-1		S	MR			26.6					Three-way cross	IR70179-10-1-1-2-3-2-2
IR 70177-76-1-1-3	2955.85	230.007	0.720009	IR43524-55-1-3-2/IR54119-SRN4-B-1-1//IR46237-105-3-3-1		S	MR			24.7	33.8				Three-way cross	IR70177-76-1-1-3
IR 74118-4-3-1-1	2951	230.249	0.719421	IR69502-6-SRN3-UBN1-B-10-2/IRRI119		S	S			26.1	26.9				Single cross	IR74118-4-3-1-1
IR 77298-14-1-2	2949.11	230.479	0.718861	IR 64/Aday Sel//3*IR 64	qDTY 2.2+qDTY 9.1	S	MR	6.61	2.15	23.6	42.8	11	I		Backcross		Torres and Henry, 2018
UPLRi 7	2940.29	257.686	0.648567	NA				6.59	2.57	24.6	54.6	12.3	L	Upland rice variety	Double cross	Yeanelo -2	Chaudhary et al. 1998
IR 02L103	2938.33	235.976	0.705288	IR68815-51-PMI2-UBN7-1-B/IR69726-116-1-3		MR									Single cross	IR76240-B-R-R-R-29-3
IR 71726-18-2-1-2	2934.6	235.904	0.705469	IR67406-15-2-6-3/IR67616-68-3-1-3		MR	MR			21.3	49.3				Single cross	IR71726-18-2-1-2
IR 14L158	2910.86	255.792	0.653715	IR81039-B-173-U3-3/IR81063-B-94-U3-1				6.37	2.24	24.7	79.3	4.3	L	Stable and high-yielding in alternate wetting and drying across variable ecosystems	Single cross	IR93827-29-2-1-3	Sandhu et al 2017	https://www.frontiersin.org/articles/10.3389/fpls.2017.01879/full#T4
IR 98939-14-1-2-3	2908.66	256.846	0.650854	IRRI177/MTU1010				6.96	2.13	21.8	42.6	6.5	I		Single cross	IR98939-14-1-2-3
IR 13L495	2907.59	413.157	0.096579	IR91659:54-35//IR81896-B-B-195/2*IR05F102	qDTY1.1+ qDTY3.1+Sub 1			5.6	2.34	24.6	56.1	1.5	I	Tolerant to drought and submergance	Three-way cross	IR96321-1447-651-B-1-1-2, Bahuguni dhan-1	https://strasa.irri.org/varietal-releases
IR 54447-3B-10-2	2907.07	413.156	0.096582	BKNFR76106-16-0-1/IR9764-45-2-2//IR50404/Nonabokra				6.18	2.5	26.2	50.1	8	L	Low CT and High CF	Double cross	IR54447-3B-10-2
IR 14L530	2903.61	256.112	0.652847	IR09L272/IR10L128				6.49	2.28	26.2	51.4	3.3	L		Single cross	IR97043-5-1-1-1	Maharjan et al. 2019
IR 98856-6-1-2-2	2900.6	256.99	0.650463	IR11L269/IR07A253				6.68	2.19	25.1	38.7	15.3	I		Single cross	IR98856-6-1-2-2
IRRI 122	2896.33	229.43	0.721412	IR50401/IR42068-22-3-3-1-3		MR	MR	6.56	2.06	22.8	47.8	6.6	I/L		Single cross	IR62141-114-3-2-2-2, PSB RC 80	https://sites.google.com/irri.org/irri60/home
IR 98939-14-1-2-1	2892.11	256.697	0.651259	IRRI177/MTU1010				6.87	2.16	22,8	33	10	I		Single cross	IR98939-14-1-2-1
IR 15F1742	2871.73	413.159	0.0965701	IR12F355/IR09L337				5.5	2.44	25.4	48.9	3.7	I	Drought and Salinity Resistant	Single cross	IR103401-B-B-3-3
IRRI 189	2843.35	250.554	0.66775	Dhagaddeshi/IR77080-B-34-3		MR		6.65	2.3	26.9	48.4	18.7	HI	Moderate resistance BPH, Yield advantage of 13% over PSB 14	Single cross	IR86781-3-3-1-1, Sahod Ulan 19, NSIC 2015 RC 428	https://sites.google.com/irri.org/irri60/home
IR 14L331	2834.68	253.819	0.659035	IR09L272/IR10L128				6.56	2.18	24.7	35.7	2.3	L		Single cross	IR97043-5-2-1-3
IR 14L583	2826.66	256.109	0.652856	IR08N158/IR09L272				6.28	2.31	25.9	35.4	3.8	L		Single cross	IR97086-30-1-1-1
IR 98976-20-1-2-2	2819.53	258.742	0.64568	IR11L152/Sabitri				6.49	2.23	20.8	41.3	7.9	I	Tolerant to Drought	Single cross	IR98976-20-1-2-2
IR02A149	2814.72	245.892	0.679999	IR00A107/PSB RC 54											Single cross	IR75298-59-3-1-3
IR 14L525	2801.91	256.549	0.651661	IR09L272/IR10L149				6.6	2.36	23.6	21.8	3.7	HI		Single cross	IR97042-7-1-1-3
IR 75013-81-LBN-1-1	2795.59	250.575	0.667697	IR74135/IR69502-6-SRN-3-UBN-1-B-1		MR				26.3					Three-way cross	IR75013-81-LBN-1-1
IR 15L1008	2789.27	253.919	0.658767	IRRI176/IR11L186		MR		6.65	2.25	23.6	47.4	3.2	L		Single cross	IR98786-13-1-2-1	Sharma et al. 2020; Acharya and Sujata, 2021	https://www.researchgate.net/publication/345081957_Screening_of_rice_genotypes_for_leaf_blast_resistance_under_field_condition; https://media.neliti.com/media/publications/331377-field-screening-of-rice-oryza-sativa-l-g-a5e654a2.pdf
IR 14L374	2785.57	256.329	0.652258	IR09L272/IR08L181				6.89	2.27	24	34.1	1.4	L		Single cross	IR97052-4-3-1-1
IR 80227 H	2764.19	246.877	0.677433	IR73328A/IR73885-1-4-1-4-3-6R		MR									Single cross	IR80227H
IR 72862-27-3-2-3	2628.8	239.407	0.696656	IR63868-2-3-2-3-2/IR00A104		R	MR			25.4	37				Single cross	IR72862-27-3-2-3
IRRI 143	2415.81	240.868	0.692944	IR64(WH)/Aday Sel//3*IR64	qDTY9.1+qDTY2.2	S	R			18.4				Adaptable to DSR, moderate resistant to Sheath blight	Backcross	IR77298-5-6, NSIC RC140
IR 69715-72-1-3	2366.17	245.851	0.680107	IR72/IRKESAR//IR1561-228-3*2/Utrirajapan		R				20.5	34.4			Good general combiner for root length and root shoot ratio	Complex cross	IR69715-72-1-3	Malarvizhi et al. 2011
Drought Tolerant Checks
Safri17	2254.3	264.353	0.630147	Safri		S	MR								Landrace cultivar	Safri-17, IET10745	http://www.drdpat.bih.nic.in/Rice%20Varieties%20-%2001.htm
Sahbhagi Dhan	2668.12	252.32	0.663052	IR55419-4*2/Wayrarem	qDTY3.1 +qDTY6.1 +qDTY6.2+qDTY12.1	MR								DSR Recommeded upland & transplanted lowland rice	Backcross	BRRI Dhan 56, Sookha Dhan 3	https://www.rkbodisha.in/sites/default/files/2019-10/STRVs%20Varietal%20Catalogue-Stress%20Tolerant%20Rice-Paddy%20Varieties%20-%20English.pdf
Rajashree	2628.68	254.555	0.657056	N22/.		MR	S								Natural variant	Rajshree, IET8975, Radha11	http://drdpat.bih.nic.in/Rice%20Varieties%20-%2005.htm
Vandana	2814.1	382.414	0.226022	CO22/Kalakeri	qDTY6.1	MR		6.04	2.41	23.1	54.5	1.4	L		NA		http://drdpat.bih.nic.in/Rice%20Varieties%20-%2010.htm
Traditional Donors/Landraces	QTLs	Additional Information(if any)
Wayrarem	qDTY12.1	50% VANDANA (aus) and 50% tropical japonica
Apo	qDTY 2.1
N22	qDTY1.1
Vandana	qDTY2.3+qDTY3.2
Aday Sel	qDTY 2.2+qDTY 9.1
Moroberekan	qDTY3.2
Improved Donors/NILs	Parentage	QTLs
IR91659-54-35		qDTY1.1
IR86918-B-305	N22/IR64	qDTY1.1
IR77298-14-1-2-10	IR64/Aday Sel(NILs)	qDTY2.2
IR87728-367-B-B	IR77298-5-6-18/IR64	qDTY2.2
IR81896-B-B-195	IRRI132/2*Swarna(ApoNILs)	qDTY2.1+qDTY3.1
IR77298-5-6-18		qDTY3.2
IR86931-B-6	N22/Swarna	qDTY3.2+qDTY9.1
IR87728-59-B-B		qDTY9.1
IR74371-46-1-1	Vandana*Wayrarem (NILs)	qDTY12.1
IR84984-83-15-18-B	Vandana*Wayrarem (NILs)	qDTY12.1
IR90019-17-159-B	IR79971-B-102-B-B/3*Vandana	qDTY12.1
IR87728-75-B-B	Aday Sel/IR64	qDTY2.2+qDTY4.1
IR77298-14-1-2-17		qDTY2.2+qDTY4.1
IR55419-4		qDTY3.1 +qDTY6.1 +qDTY6.2
IR77298-14-1-2-17		qDTY2.2+qDTY4.1
IR86918-B-315		qDTY1.1+qDTY1.2
IR74371-46-1-1 (SookhaDhan1)	Wayrarem/2*IR55419-4 (NILs)	qDTY12.1
IR77298-5-6-18	Sabitri (NILs)	qDTY3.2 +qDTY12.1
Abbreviations	Traits
CT	Canopy Temperature
CF	Chlorophyll Fluorescence
PC	Protein Content
MR	Milling Recovery
DSR	Direct-Seeded Rice
HRR	Head Rice Recovery
ASV	Alkali Spreading Value
Blast & Blight Scores Ranges
Scale (0-9)	http://www.knowledgebank.irri.org/images/docs/rice-standard-evaluation-system.pdf
2021-01-03	Resistant
2021-04-06	Moderately Resistant
2021-07-09	Susceptible
Alkali Spreading Value
H	High
I	Intermediate
L	Low
HI	High to Intermediate

## Sheet: References
References
Acharya A, Adhikari N, Amgain RB, Poudel A, Yadav R, Poudyal K (2018) Identification of rice genotypes resistant to bacterial leaf blight disease using SSR markers. J Inst Agric Anim Sci 35:113–120. https://doi.org/10.3126/jiaas.v35i1.22521
Acharya B, Sujata KC (2021) Field screening of rice (Oryza sativa L.) genotypes for resistance to bacterial leaf blight (Xanthomonas oryzae pv. oryzae) disease. J Agric Nat Res 4:42–49. https://doi.org/10.3126/janr.v4i1.33201
Bashier A, Masanga J, Kariuki W, Runo S (2018) Simple sequence repeat (SSR) markers linked to drought tolerant traits in selected Sudanese rice (Oryza sativa L.) genotypes. Afr J Biotechnol. 17:649–659. https://doi.org/10.5897/AJB2018.16466
Chaudhary RC, Seshu DC, Alluri K, Cuevas-Perez F, Lopez VC, Khush GS (1998) INger-derived rice varieties directly released in various countries. Manila (Philippines) Int. Rice Res. Inst. 37p
IRRI 1960-2020, 60 Years of rice varieties, International Rice Research Institute, Manila, https://sites.google.com/irri.org/irri60/home Accessed 5 Aug 2021
Maharjan M, Adhikari B (2019) Participatory varietal selection on drought-tolerant rice at Sundarbazar, Lamjung. Int J Agrochem 5:1
Malarvizhi D, Thiyagarajan K, Vijayalakshmi C (2011) Genetic analysis for yield and physiological traits in developing rice hybrids for aerobic environment. Oryza 48:211-221
Rice Varieties. In: Pinoy Rice Knowledge Bank. https://www.pinoyrice.com/rice-varieties/ Accessed 5 Aug 2021
Sandhu N, Subedi SR, Yadaw RB, Chaudhary B, Prasai H, Iftekharuddaula K, Thanak T, Thun V, Battan KR, Ram M, Venkateshwarlu C, Lopena V, Pablico P, Maturan PC, Sta Cruz MT, Raman A, Collard B, Kumar A (2017). Root traits enhancing rice grain yield under alternate wetting and drying condition. Front Plant Sci 8:1879. https://doi.org/10.3389/fpls.2017.01879
Sandhu N, Yadav S, Catolos M, Sta Cruz MT, Kumar A (2021) Developing climate-resilient, direct-seeded, adapted multiple-stress-tolerant rice applying genomics-assisted breeding. Front Plant Sci 12:. https://doi.org/10.3389/fpls.2021.637488
Sharma P, Magar P, Yadaw R (2020) Screening of rice genotypes for leaf blast resistance under field conditions. J Agric Nat Resour 3:276–286. https://doi.org/10.3126/janr.v3i2.32515
Standard evaluation system for rice (SES). (2002) International Rice Research Institute, Manila. http://www.knowledgebank.irri.org/images/docs/rice-standard-evaluation-system.pdf
STRASA Legacy site - Climate-smart rice. https://strasa.irri.org/varietal-releases. Accessed 5 Aug 2021
Vergara GV, Collard BCY, Pamplona A, Gregorio GB (2016). Fast-tracking rice varietal testing and adoption in different ecosystems in the Philippines. In: 36th Rice Technical Working Group (RTWG) meeting, Galveston, Texas, US. https://doi.org/10.13140/RG.2.1.2575.2727
Torres RO, Henry A (2018) Yield stability of selected rice breeding lines and donors across conditions of mild to moderately severe drought stress. Field Crops Res. 220:37. https://doi.org/10.1016/j.fcr.2016.09.011
Stress-tolerant rice varieties, https://www.rkbodisha.in/sites/default/files/2019-10/STRVs%20Varietal%20Catalogue-Stress%20Tolerant%20Rice-Paddy%20Varieties%20-%20English.pdf . Accessed 5 Aug 2021
Bhagwat S, Gokhale N, Sawardekar S, Kelkar VG, Kambale SR, Kunkarker RL (2017) Evaluation of rice ( Oryza sativa L.) germplasm for biotic and abiotic stresses and their genetic diversity using SSR markers. Oryza, 54(3):258-265. https://doi.org/10.5958/2249-5266.2017.00035.2
Rice varieties in India. http://drdpat.bih.nic.in/Rice%20Varieties%20-%2005.htm. Accessed 5 Aug 2021
Rice varieties in India. http://drdpat.bih.nic.in/Rice%20Varieties%20-%2010.htm. Accessed 5 Aug 2021
Rice varieties in India. http://www.drdpat.bih.nic.in/Rice%20Varieties%20-%2001.htm. Accessed 5 Aug 2021
PSB Rc 14 Rice - Our Technologies - OVCRE. https://ovcre.uplb.edu.ph/research/our-technologies/article/230-psb-rc-14-rice. Accessed 14 Sep 2021
